# Supplementary material for: Endophytic Bacillus vallismortis and Bacillus tequilensis bacteria isolated from medicinal plants enhance phosphorus acquisition and fortify Brassica napus L. vegetative growth and metabolic content
Source: Frontiers journal article supplement (doi:10.3389/fpls.2024.1324538), 2024-03-22
Supplement: Data_Sheet_1.docx [file Data_Sheet_1.docx]

**Endophytic *Bacillus vallismortis* and *Bacillus tequilensis* bacteria isolated from medicinal plants enhance phosphorus acquisition and fortify *Brassica napus* L. vegetative growth and metabolic content**

**Aziza Nagah1, Mostafa M. El-Sheekh2*,** [**Omnia M. Arief**](https://www.cambridge.org/core/search?filters%5BauthorTerms%5D=Omnia%20M.%20Arief&eventCode=SE-AU)**1, Mashael Daghash Alqahtani3, Basmah M. Alharbi4,5, Ghada E. Dawwam1**

1Botany and Microbiology Department, Faculty of Science, Benha University, Benha,13518, Egypt.

2Botany Department, Faculty of Science, Tanta University, Tanta 31527, Egypt.

3Department of Biology, College of Sciences, Princess Nourah bint Abdulrahman University, P.O.BOX 84428, Riyadh 11671, Saudi Arabia.

4Biology Department, Faculty of Science, University of Tabuk, Tabuk 71491, Saudi Arabia.

5Biodiversity Genomics Unit, Faculty of Science, University of Tabuk, Tabuk, Saudi Arabia

***Correspondence:
Mostafa M. El-Sheekh; E mail:** [mostafaelsheikh@science.tanta.edu.eg](mailto:mostafaelsheikh@science.tanta.edu.eg)

**Supplementary Table S1: Thirty-eight endophytic bacteria obtained from roots and leaves of nine medicinal plants gathered from different farms at Qalyubiya Governorate, Egypt**.

| Name of Medicinal plant | Plant part | Number of isolates | Isolate code |
| --- | --- | --- | --- |
| Marjoram*(Origanum majorana)* | Root | 4 | 1P-4P |
| Leaf | 2 | 5p,6p |
| Lavender (*Lavandula)* | Root | 3 | 7P-9P |
| Leaf | 2 | 10P,11P |
| Mint ([*Mentha spicata*](https://en.wikipedia.org/wiki/Mentha_spicata)*)* | Root | 3 | 12P-14P |
| Leaf | 1 | 15P |
| Stevia *(Stevia rebaudiana)* | Root | 5 | 16P-20P |
| Leaf | 2 | 21P,22P |
| Rosemary *(Salvia Rosmarinus)* | Root | 3 | 23P-25P |
| Leaf | 1 | 26P |
| Kalanchoe *(Kalanchoe blossfeldiana)* | Root | 2 | 27P,28P |
| Leaf | 1 | 29P |
| Lemon *(Citrus limon)* | Root | 2 | 30P,31P |
| Leaf | 1 | 32P |
| (Nerium) *Nerium oleander* | Root | 2 | 33P,34P |
| Leaf | 1 | 35P |
| Roselle *(Hibiscus sabdariffa)* | Root | 2 | 36P,37P |
| Leaf | 1 | 38P |

| Treatment | Shoot height (cm) | Shoot FM (g) | Shoot DM (g) | Leaf area (mm2 ) | Root height (cm) | Root FM (g) | Root DM (g) | Root Mass ratio | Total DM (g) |
| --- | --- | --- | --- | --- | --- | --- | --- | --- | --- |
| Control | **25.5a±4.96** | **12.04a±4.05** | **0.88a±0.455**  **±** | **98.73a± 12.05**  **±** | **6.50a±2.24**  **±** | **0.20a±0.088**  **±** | **0.04a±0.022**  **±** | **0.04a±0.020** | **0.92a±0.45**  **±** |
| *B. vallismortis* | **27.780ab±4.43** | **13.99ab±3.13** | **1.17ab±0.30**  **±** | **149.30bcd±46.84**   | **46.84** | | --- | | | | |   **±** | **10.04abcd±2.477**  **±** | **0.30ab±0.21**  **±** | **0.05ab±0.02**  **±** | **0.05a±0.03**  **±** | **1.23ab±0.29**  **±** |
| *B. tequilensis* | **28.5ab±1.50**   | **28.500** | | --- | | | | |  | **28.500** | | --- | | | | | | **13.15a±2.42** | **1.15ab±0.21**  **±** | **167.25bcde±37.40**   | **37.40** | | --- | | | | |   **±** | **10.20abcd±2.59**  **±** | **0.63bcde±0.24**  **±** | **0.13cde±0.05**  **±** | **0.01bcd±0.03** | **1.28ab±0.23**  **±** |
| (*B.vallismortis+B.tequilensi*s)  *Quilensis* | **30.8abc±1.30** | **17.76bc±2.32**   | **2.32** | | --- | | | | | | **1.49ab±0.22**  **±** | **216.34efg±45.41**  **±** | **10.20cd±1.79** | **0.61bcde±0.29**  **±** | **0.15cde±0.03**  **±** | **0.09c±0.01** | **1.64bc±0.25**  **±** |
| 50%P | **27.75abc±5.64** | **14.77abc±5.31** | **1.25ab±0.46**  **±** | **119.21ab±23.49**  **±** | **10.56bcd±2.38**  **±** | **0.76abcdef±0.86** | **0.30fg±0.17**  **±** | **0.20bcdefg±0.12** | **1.55abc±0.47**  **±** |
| | 50%P+ *B. vallismortis* | | --- | | 50%P+ *B. tequilensis* | | 50%P+(*B.vallismortis+B.tequilensis)* | | **29.4abc±2.04** | **15.58abc±3.55** | **1.34ab±0.33**  **±** | **165.37bcde±72.38**  **±** | **12.76bc±4.82**  **±** | **0.63bcde±0.23** | **0.10bcd±0.04**  **±** | **0.07abc±0.03** | **1.44ab±0.33**  **±** |
| | 50%P+ *B. vallismortis* | | --- | | 50%P+ *B. tequilensis* | | 50%P+(*B.vallismortis+B.tequilensis)* | | **28.7abc±2.05** | **14.52abc±4.09** | **1.27ab±0.31**  **±** | **177.69cdef±30.54**  **±** | **10.75cd±0.18**  **±** | **0.85ef±0.14** | **0.18def±0.04**  **±** | **0.13cde±0.04** | **1.46ab±0.30**  **±** |
| 50%P*+*(*B.vallismortis+B.tequilensis*) | **33.5c±4.12** | **23.46c±6.94** | **2.12abc±0.74** | **296.99g±49.86**  **±** | **11.16bcd±2.97**  **±** | **0.99cdef±0.51** | **0.43gh±0.1**  **±** | **0.18ef±0.06** | **2.56c±0.81**  **±** |
| 75% P | **26.3ab±4.47** | **12.48a±3.22** | **1.02ab±0.33**  **±** | **122.61abc±22.79**  **±** | **7.10ab±1.88**  **±** | **0.36abc±0.24** | **0.39gh±0.06**  **±** | **0.29fg±0.09** | **1.41ab±0.29**   | **0.33** | | --- | | | | |   **±** |
| 75%P+ *B. vallismortis* | **27.8ab±1.89** | **13.06a±2.81** | **1.09ab±0.28**  **±** | **143.83abc±33.22**  **±** | **11.30cd±2.46**  **±** | **0.9 cdef±0.38** | **0.53h±0.08**  **±** | **0.33g±0.05** | **1.63bc±0.32**  **±** |
| 75%P+ *B. tequilensis* | **27.5a±3.28** | **13.90abc±4.67** | **1.14ab±0.41**  **±** | **158.61bcde±54.81**  **±** | **14.30d±3.05**  **±** | **0.62bcde±0.22** | **0.09bc±0.04**  **±** | **0.07abc±0.03** | **1.22ab±0.43**  **±** |
| 75%P+(*B.vallismortis+B.tequilensis*) | **32.32bc±2.35** | **19.71bc±4.79** | **1.72ab±0.47**  **±** | **267.66fg±61.60**   | **61.60** | | --- | | | | |   **±** | **13.26d±2.26**  **±** | **0.54bcd±0.17** | **0.12cde±0.08**  **±** | **0.07abc±0.04** | **1.84bc±0.52**  **±** |
| 100 % P | **29.50abc±3.43** | **16.19abc±4.61** | **1.33ab±0.39**  **±** | **173.51bcdef±63.33**  **±** | **9.70abcd±3.15**  **±** | **0.46bcd±0.13** | **0.22ef±0.16**  **±** | **0.15de±0.04** | **1.55bc±0.33**  **±** |
| 100%P+ *B. vallismortis* | **29.1ab±3.94** | **16.27abc±5.57** | **1.36ab±0.49**  **±** | **146.68abc±23.35**  **±** | **9.70bc±1.52**  **±** | **0.52bcd±0.19** | **0.08bc±0.03**  **±** | **0.06ab±0.02** | **1.44ab±0.50**  **±** |
| 100%P+ *B. tequilensis* | **29.8abc±2.93** | **16.69abc±5.38** | **1.42ab±0.50**  **±** | **143.23bc±8.45**  **±** | **14.40cd±4.32**  **±** | **1.09f±0.18** | **0.14cde±0.03**  **±** | **0.10abcde±0.05** | **1.55 abc±047**  **±** |
| 100%P+(*B.vallismortis+B.tequilensis)*)*)* | **30abc±4.06** | **17.42abc±5.50** | **1.45ab±0.53**  **±** | **211.09defg±48.01**  **±** | **9.70bc±1.30**  **±** | **0.59bcde±0.26** | **0.48gh±0.07**  **±** | **0.026fg±0.071** | **1.93bc±0.53**  **±** |

**Supplementary Table S2:** The Effect of different concentrations of phosphorus (0, 50, 75, and 100%P) alone and/or in combination with *B. vallismortis*, *B. tequilensis* or both bacterial isolates*.* on the vegetative growth of canola ((*Brassica napus L*.) plant


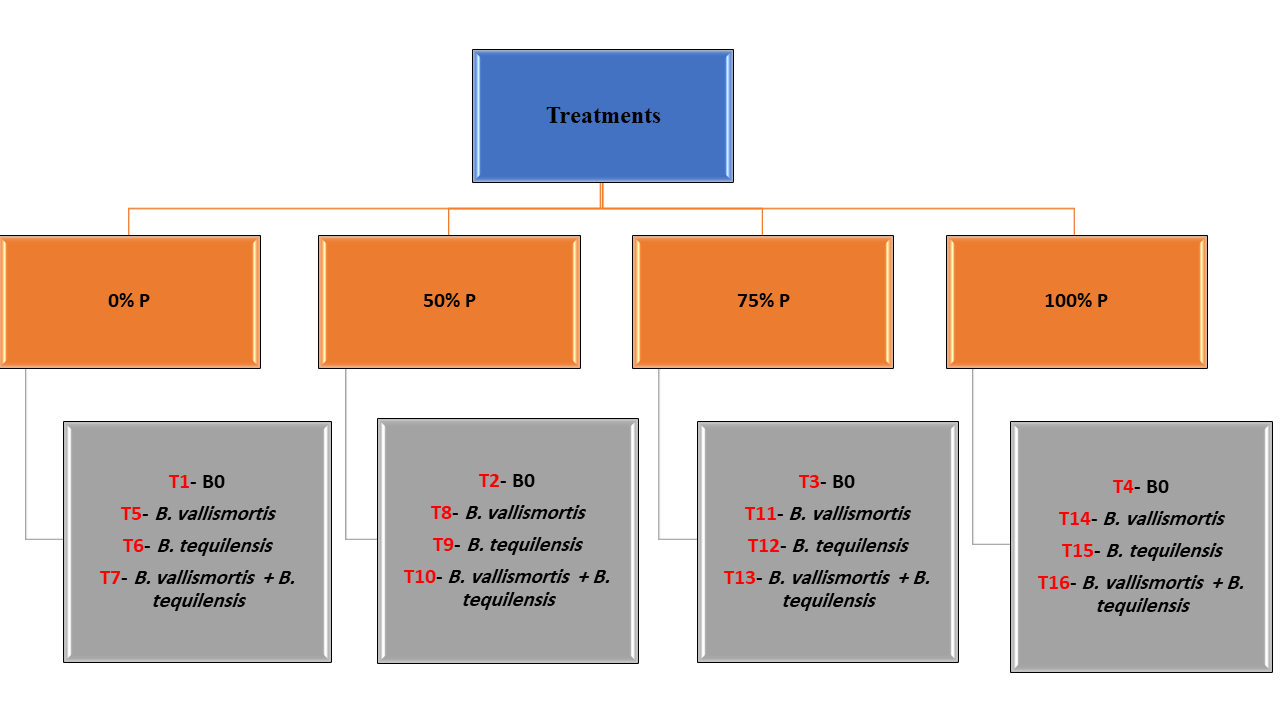


**Supplementary Figure 1**: **Description of the treatments tested for canola (*Brassica napus* L.) growth during the experiment course. *Note: the concentrations of P (as P2O5), were achieved by the following recipes: 100% P (0.39 g/2 Kg sand: clay soil mixture), 75% P (0.225 g/2 Kg sand: clay soil mixture), 50% P (0.195 g/2 Kg sand: clay soil mixture)**
